# Supplementary material for: Genome-Wide Analysis Elucidates the Role of CONSTANS-like Genes in Stress Responses of Cotton
Source: MDPI journal article supplement (doi:10.3390/ijms19092658), 2018-09-07
Supplement: s1 [file s1]

Table S2: Gene loci information of cotton CO-like genes

| Gene ID | Gene locus         | Chr.  | Direction | Start     | End       | Gene ID    | Gene locus          | Chr.         | Direction | Start    | End      |
|---------|--------------------|-------|-----------|-----------|-----------|------------|---------------------|--------------|-----------|----------|----------|
| GrCOL1  | Gorai.001G039500.1 | Chr01 | -         | 3676945   | 3678125   | GhCOL1_Dt  | Gh_D07G0334         | D07          | -         | 3531553  | 3532642  |
| GrCOL2  | Gorai.001G099700.1 | Chr01 | -         | 11189054  | 11193404  | GhCOL2_Dt  | Gh_D07G0867         | D07          | -         | 11252477 | 11254842 |
| GrCOL3  | Gorai.001G190000.1 | Chr01 | +         | 31160664  | 31165694  | GhCOL3_Dt  | Gh_D07G1645         | D07          | +         | 32928032 | 32931325 |
| GrCOL4  | Gorai.001G223800.1 | Chr01 | -         | 45684954  | 45689894  | GhCOL4_Dt  | Gh_D07G1957         | D07          | -         | 48829548 | 48832565 |
| GrCOL5  | Gorai.002G022300.1 | Chr02 | +         | 1556020   | 1559124   | GhCOL5_Dt  | Gh_D01G0200         | D01          | +         | 1674672  | 1677093  |
| GrCOL6  | Gorai.002G218400.1 | Chr02 | -         | 57033477  | 57035219  | GhCOL6_Dt  | Gh_D01G1811         | D01          | +         | 55566742 | 55568047 |
| GrCOL7  | Gorai.003G104600.1 | Chr03 | -         | 32248407  | 32249974  | NA         | NA                  | NA           | NA        | NA       | NA       |
| GrCOL8  | Gorai.004G030300.1 | Chr04 | -         | 2397135   | 2398635   | GhCOL8_Dt  | Gh_D08G0269         | D08          | -         | 2563414  | 2564444  |
| GrCOL9  | Gorai.004G061000.1 | Chr04 | +         | 6015304   | 6020382   | GhCOL9_Dt  | Gh_D08G0537         | D08          | +         | 6121175  | 6124445  |
| GrCOL10 | Gorai.004G102000.1 | Chr04 | +         | 18922045  | 18923759  | GhCOL10_Dt | Gh_D08G0923         | D08          | +         | 19535668 | 19536870 |
| GrCOL11 | Gorai.004G113000.1 | Chr04 | +         | 25961240  | 25963398  | GhCOL11_Dt | Gh_D08G1030         | D08          | -         | 27169749 | 27171161 |
| GrCOL12 | Gorai.004G140600.1 | Chr04 | -         | 39574008  | 39590545  | GhCOL12_Dt | Gh_D08G1289         | D08          | -         | 42371421 | 42388486 |
| GrCOL13 | Gorai.006G061600.1 | Chr06 | +         | 22449476  | 22451500  | GhCOL13_Dt | Gh_D09G0473         | D09          | -         | 23131764 | 23133122 |
| GrCOL14 | Gorai.007G164600.1 | Chr07 | +         | 14483656  | 14489122  | GhCOL14_Dt | Gh_D11G1518         | D11          | +         | 15171039 | 15174582 |
| GrCOL15 | Gorai.008G008400.1 | Chr08 | -         | 1001595   | 1004408   | GhCOL15_Dt | Gh_D12G0077         | D12          | -         | 1018268  | 1020091  |
| GrCOL16 | Gorai.008G059900.1 | Chr08 | +         | 9451492   | 9453391   | GhCOL16_Dt | Gh_D12G0543         | D12          | +         | 9963089  | 9964699  |
| GrCOL17 | Gorai.009G065600.1 | Chr09 | -         | 4656585   | 4658271   | GhCOL17_Dt | Gh_D05G0635         | D05          | -         | 5090553  | 5091655  |
| GrCOL18 | Gorai.010G245200.1 | Chr10 | -         | 61425655  | 61427048  | GhCOL18_Dt | Gh_D13G1939         | D13          | +         | 54761440 | 54762533 |
| GrCOL19 | Gorai.012G083100.1 | Chr12 | +         | 13849379  | 13851855  | NA         | NA                  | NA           | NA        | NA       | NA       |
| GrCOL20 | Gorai.013G071300.1 | Chr13 | +         | 8325283   | 8330097   | GhCOL20_Dt | Gh_D13G0627         | D13          | +         | 8772549  | 8778161  |
| GrCOL21 | Gorai.013G246000.1 | Chr13 | -         | 56481092  | 56483308  | GhCOL21_Dt | Gh_D13G2210         | D13          | -         | 58226829 | 58228380 |
| GaCOL1  | Cotton_A_19228     | Ca1   | +         | 49125900  | 49127163  | GhCOL1_At  | Gh_A07G0278         | A07          | -         | 3415559  | 3416629  |
| GaCOL2  | Cotton_A_26963     | Ca1   | -         | 51719221  | 51724440  | GhCOL2_At  | Gh_A07G0806         | A07          | -         | 13791448 | 13793814 |
| GaCOL3  | Cotton_A_36596     | Ca1   | +         | 50947820  | 50956549  | GhCOL3_At  | Gh_A07G1493         | A07          | +         | 45111751 | 45115065 |
| GaCOL4  | Cotton_A_31698     | Ca1   | -         | 115728056 | 115732856 | GhCOL4_At  | Gh_A07G1753         | A07          | -         | 71671991 | 71675019 |
| GaCOL5  | Cotton_A_00045     | Ca4   | -         | 37551220  | 37554155  | GhCOL5_At  | Gh_A01G0157         | A01          | +         | 1485300  | 1487798  |
| GaCOL6  | Cotton_A_27017     | Ca1   | -         | 109563005 | 109564356 | GhCOL6_At  | Gh_A01G1562         | A01          | -         | 92459249 | 92460618 |
| GaCOL8  | Cotton_A_06763     | Ca7   | -         | 52352678  | 52354110  | GhCOL8_At  | Gh_A08G0192         | A08          | -         | 1929796  | 1930828  |
| GaCOL9  | Cotton_A_03265     | Ca7   | +         | 27567756  | 27572884  | GhCOL9_At  | Gh_A08G0451         | A08          | +         | 6093346  | 6096612  |
| GaCOL10 | Cotton_A_34286     | Ca6   | +         | 32893404  | 32894609  | GhCOL10_At | Gh_A08G0775         | A08          | +         | 29816347 | 29817552 |
| GaCOL11 | Cotton_A_35756     | Ca12  | +         | 87836722  | 87838138  | GhCOL11_At | Gh_A08G0848         | A08          | +         | 45369135 | 45370548 |
| GaCOL12 | Cotton_A_34661     | Ca7   | -         | 39152793  | 39173051  | GhCOL12_At | Gh_A08G1015         | A08          | -         | 71014737 | 71027302 |
| GaCOL13 | Cotton_A_38065     | Ca10  | +         | 61125170  | 61126742  | GhCOL13_At | Gh_A09G0466         | A09          | +         | 36932150 | 36933501 |
| GaCOL14 | Cotton_A_03720     | Ca3   | +         | 52568546  | 52572120  | GhCOL14_At | Gh_A11G1370         | A11          | +         | 17725612 | 17729183 |
| NA      | NA                 | NA    | NA        | NA        | NA        | GhCOL15_At | Gh_A12G0062         | A12          | -         | 892319   | 894142   |
| GaCOL17 | Cotton_A_01142     | Ca3   | -         | 33648414  | 33649978  | GhCOL17_At | Gh_A05G0516         | A05          | -         | 5520316  | 5521418  |
| GaCOL18 | Cotton_A_09109     | Ca5   | -         | 49086069  | 49085991  | GhCOL18_At | Gh_A13G1580         | A13          | +         | 74644413 | 74645506 |
| GaCOL19 | Cotton_A_29042     | Ca2   | -         | 55770739  | 55772849  | GhCOL19_Dt | Gh_A05G2921         | A05          | +         | 70782683 | 70784849 |
| GaCOL20 | Cotton_A_28699     | Ca5   | +         | 60903023  | 60905668  | GhCOL20_At | Gh_A13G0504         | A13          | -         | 11597181 | 11600380 |
| GaCOL21 | Cotton_A_02515     | Ca6   | +         | 51443246  | 51445174  | GhCOL21S   | Gh_Sca004<br>822G01 | Scaffold4822 | +         | 3441     | 5005     |
