# Supplementary figures and images for: Genome-Wide Analysis Elucidates the Role of CONSTANS-like Genes in Stress Responses of Cotton
Source: MDPI journal article supplement (doi:10.3390/ijms19092658), 2018-09-07

Group III

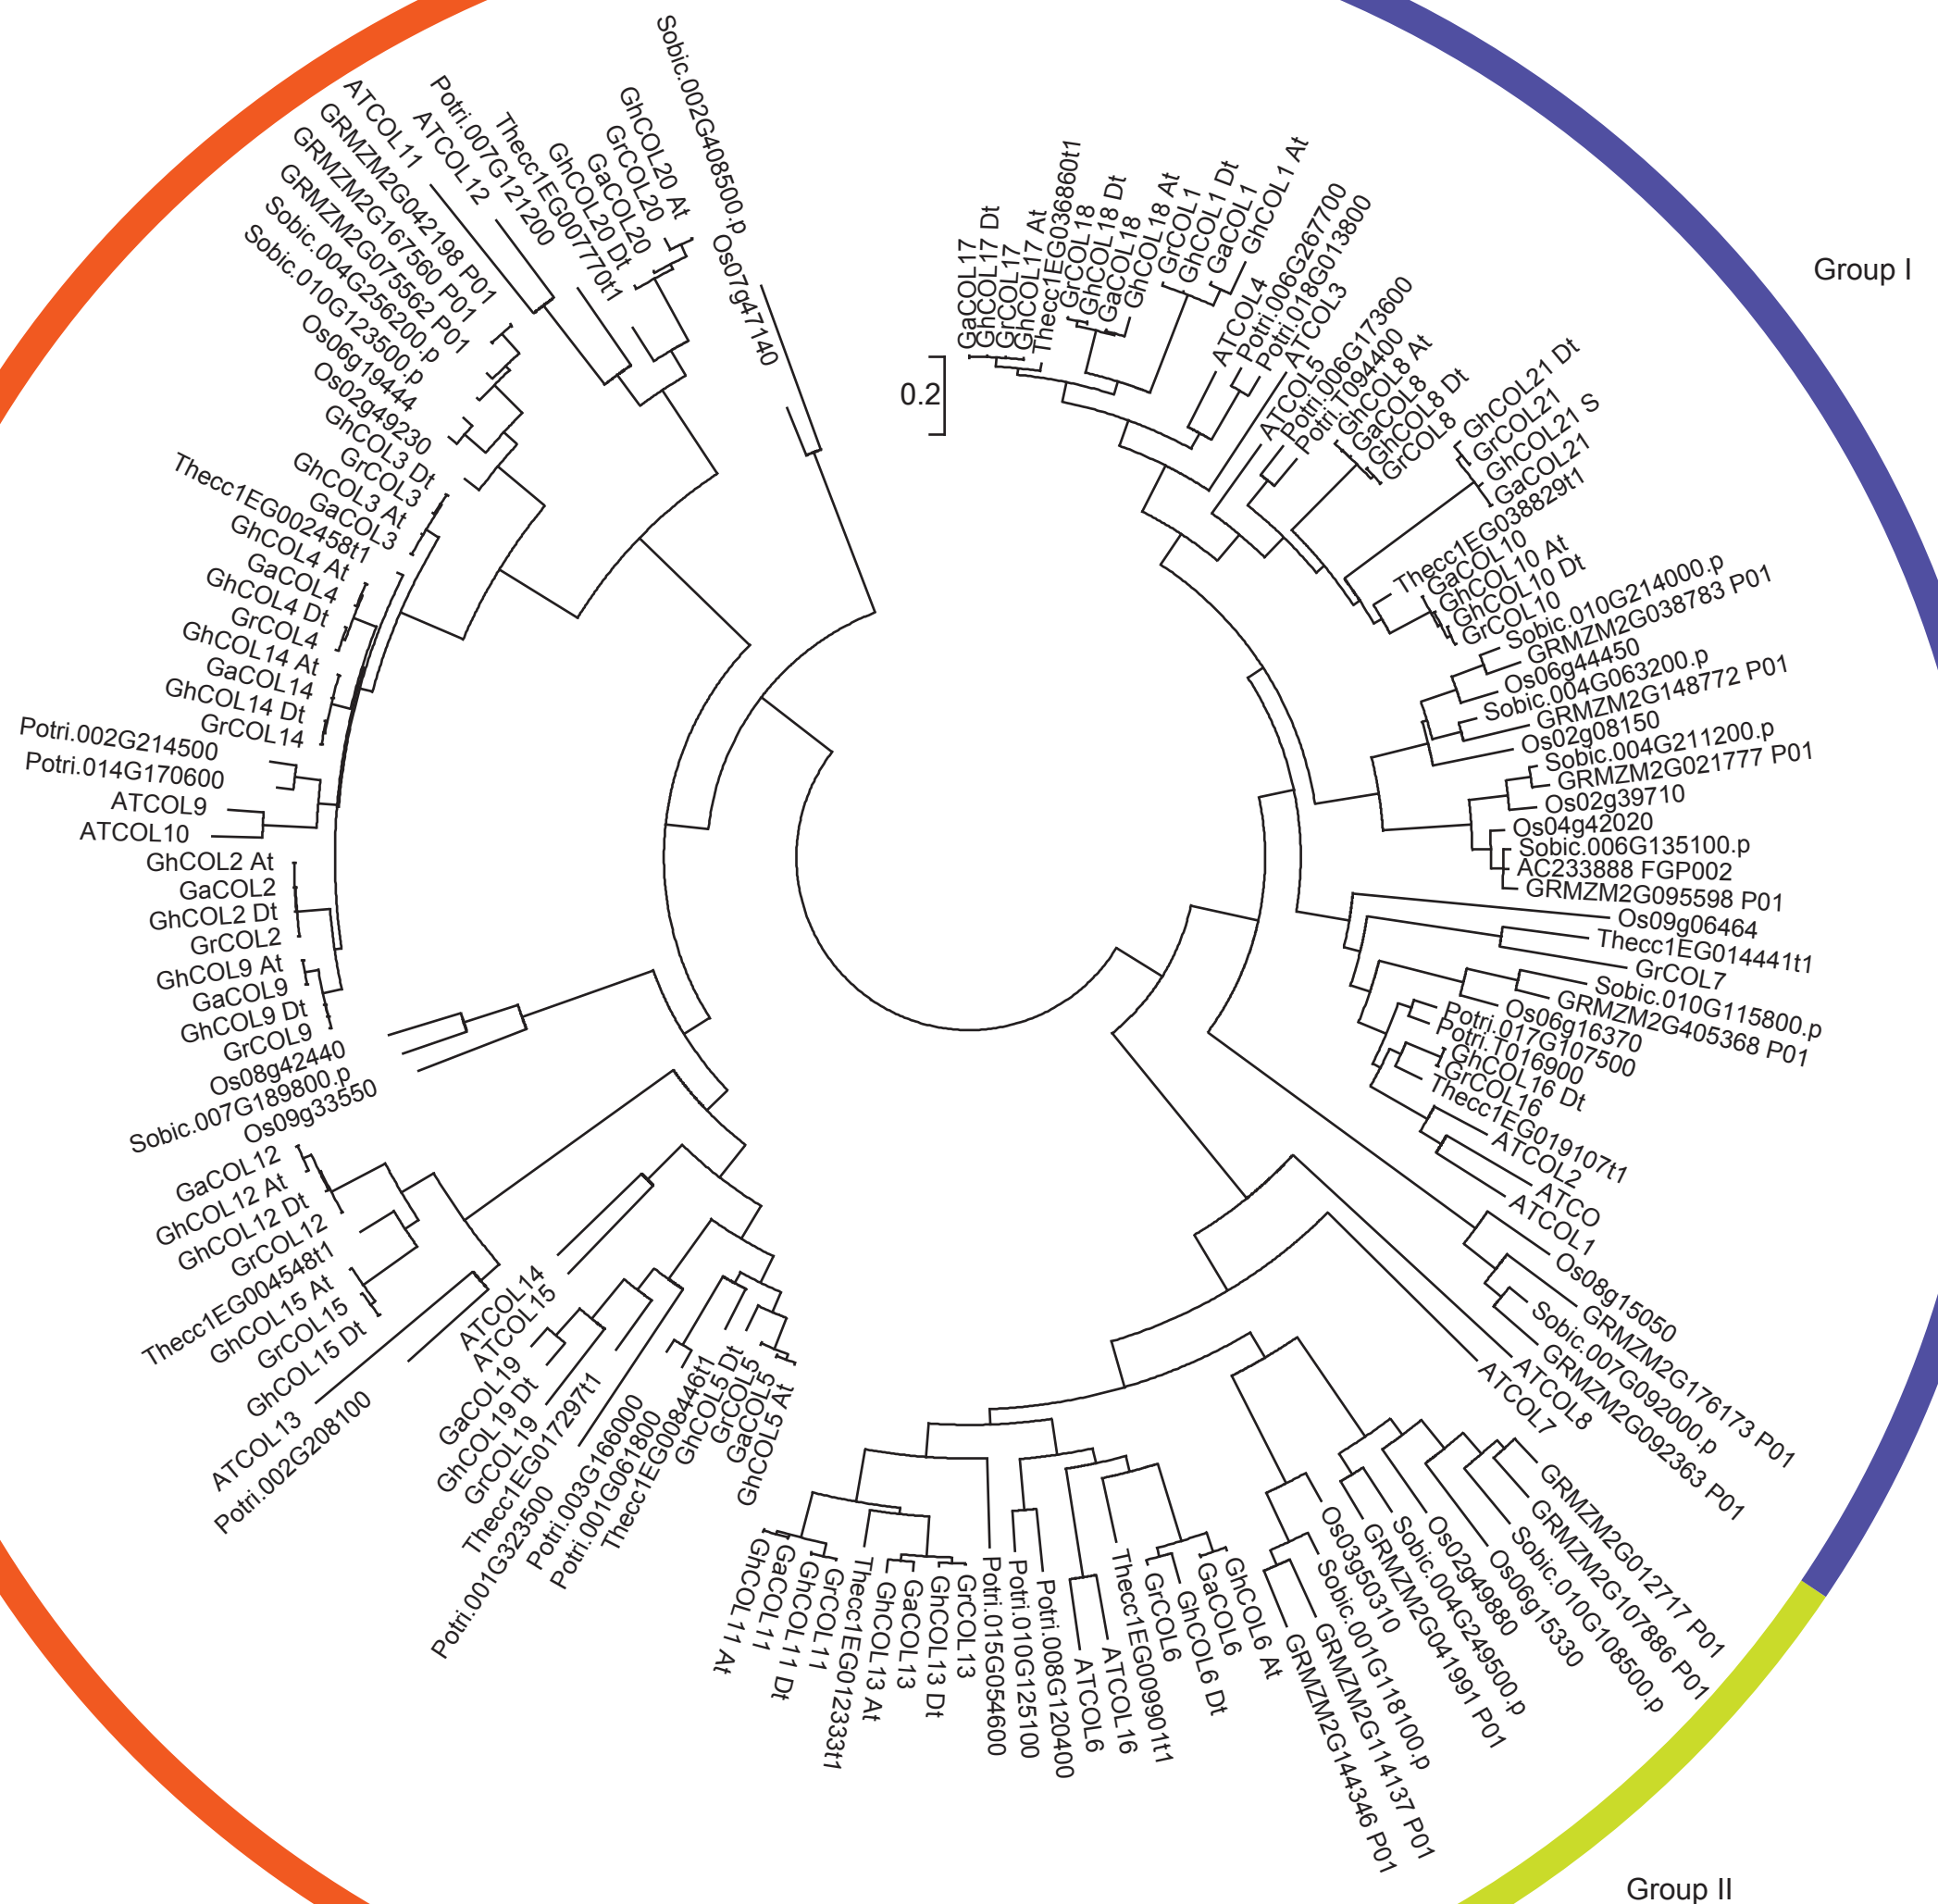

Supplement: s1 [file s1]
